# Supplementary material for: Quantitative systems pharmacology of interferon alpha administration: A multi-scale approach
Source: PubMed Central journal article supplement (PMC6374012; doi:10.1371/journal.pone.0209587), 2019-02-13
Supplement: pone.0209587.s003.pdf [file pone.0209587.s003.pdf]

**S1 Table. Reaction List.** The individual reactions for both models: the *in vitro* hepatocyte and the *in vivo* PBPK/PD model. The column with R# and Cell Compartment depict the reactions that are present in the *in vitro* hepatocyte model and where. The columns with M# and multi-scale compartment do the same for the *in vivo* PBPK/PD model. The column reactions describe the modelled pathway along with the column kinetic rate law which gives insight on the kinetics used to model each step.

| #   | Cell Compartment | Multiscale Compartment | Reaction            | Kinetic rate law                                                                                                                        |                                                                |
|-----|------------------|------------------------|---------------------|-----------------------------------------------------------------------------------------------------------------------------------------|----------------------------------------------------------------|
| R1  | -                | Cell Intracellular     | -                   | $IFN \rightarrow \emptyset$                                                                                                             | $k1 \cdot S$                                                   |
| R2  | M1               | Cell Intracellular     | Liver Interstitial  | $IFNA + IFNAR2 \rightleftharpoons IFNA\text{-}IFNAR\ 2\ \text{Complex}$                                                                 | $k1 \cdot S1 \cdot S2 - P/keq$                                 |
| R3  | M2               | Cell Intracellular     | Liver Interstitial  | $IFNA\_R2\_Complex + IFNAR1 \rightleftharpoons \text{Activated Receptor Complex}$                                                       | $k1 \cdot S1 \cdot S2 - P/keq$                                 |
| R4  | M3               | Cell Intracellular     | Liver Interstitial  | $\text{Activated Receptor Complex} \rightleftharpoons SOCS1\ IFNAR1 + IFNAR2$                                                           | $\frac{V \cdot S \cdot A}{(Kms+S)(Ka+A)}$                      |
| -   | M4               | -                      | Liver Interstitial  | $\emptyset \rightarrow IFNAR1$                                                                                                          | $rel\_exp\_out \cdot AF \cdot f_o \cdot k_t \cdot S \cdot k_t$ |
| -   | M5               | -                      | Liver Interstitial  | $\emptyset \rightarrow IFNAR2$                                                                                                          | $rel\_exp\_out \cdot AF \cdot f_o \cdot k_t \cdot S \cdot k_t$ |
| R5  | M6               | Cell Intracellular     | Liver Intracellular | $\text{Activated Receptor Complex} + STAT2c \rightarrow Rec2$                                                                           | $k1 \cdot S$                                                   |
| R6  | M7               | Cell Intracellular     | Liver Intracellular | $Rec2 + STAT1c \rightarrow Rec21$                                                                                                       | $k1 \cdot S$                                                   |
| R7  | M8               | Cell Intracellular     | Liver Intracellular | $Rec21 + IRF9c \rightarrow \text{ISGF-3c} + \text{Activated Receptor Complex}$                                                          | $k1 \cdot S$                                                   |
| R8  | M9               | Cell Intracellular     | Liver Intracellular | $\emptyset \xrightleftharpoons[\text{binding sites}]{\text{Occupied ISGF-3n}} mRNAc\_SOCS$                                              | $k1 \cdot M$                                                   |
| R9  | M10              | Cell Intracellular     | Liver Intracellular | $mRNAc\_SOCS \rightarrow \emptyset$                                                                                                     | $k1 \cdot S$                                                   |
| R10 | M11              | Cell Intracellular     | Liver Intracellular | $\emptyset \xrightleftharpoons[\text{binding sites}]{\text{Occupied ISGF-3n}} mRNAc$                                                    | $k1 \cdot M$                                                   |
| R11 | M12              | Cell Intracellular     | Liver Intracellular | $mRNAc \rightarrow \emptyset$                                                                                                           | $k1 \cdot S$                                                   |
| R12 | M13              | Cell Intracellular     | Liver Intracellular | $\emptyset \xrightleftharpoons{mRNAc} IRF9c$                                                                                            | $(k_{const} + k_{act})M - P \cdot IRF9_{deg}$                  |
| R13 | M14              | Cell Intracellular     | Liver Intracellular | $\emptyset \xrightleftharpoons{mRNAc\_SOCS} SOCS\ 1$                                                                                    | $k_{act} \cdot M - K_{deg} \cdot P$                            |
| R14 | M15              | Exchange               | Exchange            | $STAT1n \rightleftharpoons STAT1c$                                                                                                      | $k1 \cdot S - P/keq$                                           |
| R15 | M16              | Exchange               | Exchange            | $STAT2n \rightleftharpoons STAT2c$                                                                                                      | $k1 \cdot S - P/keq$                                           |
| R16 | M17              | Exchange               | Exchange            | $IRF9n \rightleftharpoons IRF9c$                                                                                                        | $k1 \cdot S - P/keq$                                           |
| R17 | M18              | Exchange               | Exchange            | $ISGF-3c \rightleftharpoons ISGF-3n$                                                                                                    | $k1 \cdot S$                                                   |
| R18 | M19              | Cell Nucleus           | Liver Nucleus       | $\text{Open ISGF-3n binding sites} + ISGF-3n \rightleftharpoons \text{Occupied ISGF-3n binding sites}$                                  | $k1 \cdot S1 \cdot S2 - P/keq$                                 |
| R19 | M20              | Cell Nucleus           | Liver Nucleus       | $\text{Occupied ISGF-3n binding sites} \rightarrow \text{STAT 1n} + \text{STAT 2n} + \text{IRF 9n} + \text{Open ISGF-3n binding sites}$ | $k1 \cdot S$                                                   |
| R20 | M21              | Cell Nucleus           | Liver Nucleus       | $IRF9n \rightarrow \emptyset$                                                                                                           | $k1 \cdot S$                                                   |
