# Supplementary material for: Quantitative systems pharmacology of interferon alpha administration: A multi-scale approach
Source: PubMed Central journal article supplement (PMC6374012; doi:10.1371/journal.pone.0209587), 2019-02-13
Supplement: pone.0209587.s004.pdf [file pone.0209587.s004.pdf]

**S2 Table. Description of the kinetic parameter values.** The below table is an exemplary representation of all the kinetic parameters obtained for the first model in the model ensemble. The receptor values were preserved from the PBPK model (S2 Table) and the value of IFN efflux was also fitted and kept constant (S2 Table). Most of the values are varied  $\pm$  50% or 75% as those used in Maiwald et al [1] or the literature values found for some parameters as stated in S3 Table. The rest of the nine models are provided as SBML files. The kinetic parameters whose values were fixed w.r.t. the PBPK model in the hepatocyte model are shown in the short second table.

| Nr.       | Parameter | fit 1        | Units      |
|-----------|-----------|--------------|------------|
| R4 & M3   | Kms       | 6.13131      | nmol/l     |
|           | V         | 2.61285      | nmol/(l*s) |
|           | Ka        | 200          | nmol/l     |
| R5 & M6   | k1        | 0.0035       | l/(nmol*s) |
| R6 & M7   | k1        | 0.000393     | l/(nmol*s) |
| R7 & M8   | k1        | 10           | l/(nmol*s) |
| R8 & M9   | k1        | 0.00691842   | 1/s        |
| R9 & M10  | k         | 13.04024e-05 | 1/s        |
| R10 & M11 | k         | 1.34948e-07  | nmol/(l*s) |
|           | Ka        | 0.0044274    | nmol/l     |
| R11 & M12 | k1        | 1.17183e-05  | 1/s        |
| R12 & M13 | irf9deg   | 1.039e-05    | 1/s        |
|           | k_const   | 4.50e-06     | nmol/(l*s) |
|           | k_act     | 8.95         | 1/s        |
| R13 & M14 | k_act     | 3.0968       | 1/s        |
|           | k_deg     | 0.0888526    | 1/s        |
| R14 & M15 | k1        | 0.0001       | 1/s        |
|           | keq       | 0.00697504   | -          |
| R15 & M16 | k1        | 2.20533e-07  | 1/s        |
|           | keq       | 0.00197389   | -          |
| R16 & M17 | k1        | 9.92815e-07  | 1/s        |
|           | keq       | 0.0297375    | -          |
| R17 & M18 | k1        | 0.00774342   | 1/s        |
| R18 & M19 | k1        | 0.123072     | l/(nmol*s) |
|           | keq       | 2.91162e-05  | l/nmol     |
| R19 & M20 | k1        | 0.10365      | 1/s        |
| R20 & M21 | k1        | 1.039e-05    | 1/s        |

| Nr. | Parameter | Value       | Unit       |
|-----|-----------|-------------|------------|
| R1  | k1        | 2.57504e-05 | 1/s        |
| R2  | k1        | 0.1         | l/(nmol*s) |
|     | keq       | 1.5         | l/nmol     |
| R3  | k1        | 0.00022     | l/(nmol*s) |
|     | keq       | 0.00077     | l/nmol     |

## References

1. Maiwald T, Schneider A, Busch H, Sahle S, Gretz N, Weiss TS, et al. Combining theoretical analysis and experimental data generation reveals IRF9 as a crucial factor for accelerating *IFN* –  $\alpha$ -induced early antiviral signalling. FEBS Journal. 2010;277(22):4741–4754. doi:10.1111/j.1742-4658.2010.07880.x.
