# Supplementary material for: Quantitative systems pharmacology of interferon alpha administration: A multi-scale approach
Source: PubMed Central journal article supplement (PMC6374012; doi:10.1371/journal.pone.0209587), 2019-02-13
Supplement: pone.0209587.s005.pdf [file pone.0209587.s005.pdf]

**S3 Table.**  $k_D$  values found in the literature.

| Molecule    | Param | $k_D$ (nM)                                    | Ref.    |
|-------------|-------|-----------------------------------------------|---------|
| ISGF3c      | $k_D$ | [10nM(STAT2), 5μM(STAT1)]                     | [1]     |
| IFN-IFNR2   | $k_D$ | [2.2nM]*                                      | [2] [3] |
| IFN-IFNR1   | $k_D$ | [2000nM]                                      | [2] [3] |
| STAT1-STAT2 | $k_D$ | [< 10nM, 5.5mM(STAT2mutant)]                  | [4]     |
| SOCS **     | $k_i$ | [1.5 ± 0.7μM(For JAK2), 1.2 ± 0.3μM(For ATP)] | [5]     |

\*IFNAR2 binds IFN-α2 with an equilibrium dissociation constant of around 5 nM and a complex lifetime of around 100 s, whereas the affinity toward IFNAR1 is three orders of magnitude lower, and the complex dissociates about 100-fold faster.

\*\* Non-competitive Inhibition

$$k_{eq} = 1/k_D$$

## References

1. Rengachari S, Groiss S, Devos J, Caron E, Grandvaux N, Panne D. Structural Basis Of STAT2 Recognition By IRF9 Reveals Molecular Insights Into ISGF3 Function. bioRxiv. 2017;doi:10.1101/131714.
2. Levin D, Harari D, Schreiber G. Stochastic Receptor Expression Determines Cell Fate upon Interferon Treatment. Molecular and Cellular Biology. 2011;31(16):3252–3266. doi:10.1128/MCB.05251-11.
3. You C, Marquez-Lago TT, Richter CP, Wilmes S, Moraga I, Garcia KC, et al. Receptor dimer stabilization by hierarchical plasma membrane microcompartments regulates cytokine signaling. Science Advances. 2016;2(12):1–13. doi:10.1126/sciadv.1600452.
4. Ho J, Pelzel C, Begitt A, Mee M, Elsheikha HM, Scott DJ, et al. STAT2 Is a Pervasive Cytokine Regulator due to Its Inhibition of STAT1 in Multiple Signaling Pathways. PLoS Biology. 2016;14(10). doi:10.1371/journal.pbio.2000117.
5. Babon JJ, Kershaw NJ, Murphy JM, Varghese LN, Laktyushin A, Young SN, et al. Suppression of cytokine signaling by SOCS3: characterization of the mode of inhibition and the basis of its specificity. Immunity. 2012;36(2):239–250.
