# Supplementary material for: Quantitative systems pharmacology of interferon alpha administration: A multi-scale approach
Source: PubMed Central journal article supplement (PMC6374012; doi:10.1371/journal.pone.0209587), 2019-02-13
Supplement: pone.0209587.s006.pdf [file pone.0209587.s006.pdf]

**S4 Table. Values of the literature parameters for the PBPK model of IFN- $\alpha$  used in this study.**

| Parameter                     | Fitted Values | Reference Value | Unit              | Reference |
|-------------------------------|---------------|-----------------|-------------------|-----------|
| Molecular Weight              | 19500(fixed)  | 19500           | g/mol             | [1]       |
| CL <sub>plasma</sub> (Kidney) | 0.003         | 0.0027          | l/min/kg organ    | [2–5]     |
| IFNAR1 Concentration          | 0.26          | -               | $\mu\text{mol/l}$ | [6–9]     |
| IFNAR2 Concentration          | 0.5           | -               | $\mu\text{mol/l}$ | [6–9]     |
| K(IFNAR1)                     | 0.1           | -               | l/nmol*s          | -         |
| K(IFNAR2)                     | 0.00022       | -               | l/nmol*s          | -         |
| K <sub>eq</sub> IFNAR1        | 0.00077       | 0.0001-0.01     | l/nmol            | [10, 11]  |
| K <sub>eq</sub> IFNAR2        | 1.5           | 0.002-0.1       | l/nmol            | [12, 13]  |
| K <sub>endocytosis</sub>      | 8.93226       | -               | 1/min             | -         |
| K <sub>t</sub> IFNAR1         | 0.02298       | -               | 1/min             | -         |
| K <sub>t</sub> IFNAR2         | 0.074999      | -               | 1/min             | -         |

## References

1. Wishart DS, Knox C, Guo AC, Shrivastava S, Hassanali M, Stothard P, et al. DrugBank: a comprehensive resource for in silico drug discovery and exploration. *Nucleic acids research*. 2006;34(Database issue):D668–72. doi:10.1093/nar/gkj067.
2. Wills RJ, Dennis S, Spiegel HE, Gibson DM, Nadler PI. Interferon kinetics and adverse reactions after intravenous, intramuscular, and subcutaneous injection. *Clinical Pharmacology & Therapeutics*. 1984;35:722–727.
3. Bocci V, Pacini A, Muscettola M, Paulesu L, Pessina GP, Santiano M, et al. Renal filtration, absorption and catabolism of human alpha interferon. *Journal of interferon research*. 1981;1:347–352. doi:10.1089/jir.1981.1.347.
4. Tamar Bino AG Zacharai Madar, Rosenberg H. The Kidney is the Main Site of Interferon Degradation. *Journal of Interferon Research*. 1982;2:301–308. doi:10.1089/jir.1982.2.301.
5. Bino T GA Edery H, H R. Involvement of the kidney in catabolism of human leukocyte interferon. *The Journal of general virology*. Mar 1982;59(Pt 1):39–45. doi:10.1099/0022-1317-59-1-39.
6. François-Newton V, de Freitas Almeida GM, Payelle-Brogard B, Monneron D, Pichard-Garcia L, Piehler J, et al. USP18-based negative feedback control is induced by type I and type III interferons and specifically inactivates interferon  $\alpha$  response. *PLoS ONE*. 2011;6(7). doi:10.1371/journal.pone.0022200.
7. Wilmes S, Beutel O, Li Z, Francois-Newton V, Richter CP, Janning D, et al. Receptor dimerization dynamics as a regulatory valve for plasticity of type I interferon signaling. *Journal of Cell Biology*. 2015;209(4):579–593. doi:10.1083/jcb.201412049.
8. Moraga I, Harari D, Schreiber G, Uzé G, Pellegrini S. Receptor density is key to the alpha2/beta interferon differential activities. *Molecular and cellular biology*. 2009;29(17):4778–87. doi:10.1128/MCB.01808-08.

9. Schreiber G, Piehler J. The molecular basis for functional plasticity in type I interferon signaling. *Trends in Immunology*. 2015;36(3):139–149. doi:10.1016/j.it.2015.01.002.
10. Gavutis M, Jaks E, Lamken P, Piehler J. Determination of the Two-Dimensional Interaction Rate Constants of a Cytokine Receptor Complex. *Biophysical Journal*. 2006;90(9):3345 – 3355. doi:http://dx.doi.org/10.1529/biophysj.105.072546.
11. Lavoie TB, Kalie E, Crisafulli-Cabatu S, Abramovich R, DiGioia G, Moolchan K, et al. Binding and activity of all human alpha interferon subtypes. *Cytokine*. 2011;56(2):282–289. doi:10.1016/j.cyto.2011.07.019.
12. Cutrone EC, Langer JA. Contributions of cloned type I interferon receptor subunits to differential ligand binding. *FEBS Letters*. 1997;404(2-3):197–202. doi:10.1016/S0014-5793(97)00129-4.
13. Rengachari S, Groiss S, Devos J, Caron E, Grandvaux N, Panne D. Structural Basis Of STAT2 Recognition By IRF9 Reveals Molecular Insights Into ISGF3 Function. *bioRxiv*. 2017;doi:10.1101/131714.
