# Supplementary material for: Quantitative systems pharmacology of interferon alpha administration: A multi-scale approach
Source: PubMed Central journal article supplement (PMC6374012; doi:10.1371/journal.pone.0209587), 2019-02-13
Supplement: pone.0209587.s007.pdf [file pone.0209587.s007.pdf]

**S5 Table. Volumes of the liver compartments.**

| <b>Volume in Litres</b> |          |
|-------------------------|----------|
| <b>Compartment</b>      | <b>l</b> |
| Interstitial            | 0.39     |
| Cytoplasm               | 1.59     |
| Nucleus                 | 0.35     |
