# Supplementary material for: Quantitative systems pharmacology of interferon alpha administration: A multi-scale approach
Source: PubMed Central journal article supplement (PMC6374012; doi:10.1371/journal.pone.0209587), 2019-02-13
Supplement: pone.0209587.s008.pdf [file pone.0209587.s008.pdf]

**S6 Table. C<sub>max</sub> and AUC values.**

| Publication                 | Dose (U)                | C <sub>max</sub> (pg/ml) |           | AUC <sup>0 → ∞</sup> (pg/ml × hr) |           |
|-----------------------------|-------------------------|--------------------------|-----------|-----------------------------------|-----------|
|                             |                         | Observed                 | Predicted | Observed                          | Predicted |
| Wills et al. (1984) [1]     | 36 × 10 <sup>6</sup>    | 13900 ± 3570             | 15759     | 17600 ± 4430                      | 16236     |
| Shah et al. (1984) [2]      | 30 × 10 <sup>6</sup>    | not defined              | 11708     | not defined                       | 10010     |
|                             | 60 × 10 <sup>6</sup>    |                          | 22581     |                                   | 19825     |
| Radwanski et al. (1987) [3] | 8.6 × 10 <sup>6</sup> † | 855                      | 3864      | 945                               | 3315      |

† where the body surface area is assumed to be 1.72 m<sup>2</sup>

## References

1. Wills RJ, Dennis S, Spiegel HE, Gibson DM, Nadler PI. Interferon kinetics and adverse reactions after intravenous, intramuscular, and subcutaneous injection. *Clinical Pharmacology & Therapeutics*. 1984;35:722–727.
2. Shah I, Band J, Samon HM, Young J, Robinson R, Bailey B, et al. Pharmacokinetics and tolerance of intravenous and intramuscular recombinant alpha 2 interferon in patients with malignancies. *American journal of hematology*. 1984;17:363–71.
3. Radwanski E, Perentesis G, Jacobs S, Oden E, Affrime M, Symchowicz S, et al. Pharmacokinetics of Interferon  $\alpha$ -2b in Healthy Volunteers. *The Journal of Clinical Pharmacology*. 1987;27(5):432–435. doi:10.1002/j.1552-4604.1987.tb03044.x.
